# Supplementary material for: Fine-tuning the surface coverage of niobium oxide on platinum catalysts and its impact on the oxygen reduction reaction
Source: Royal Society of Chemistry journal article supplement (doi:10.1039/d5lf00290g), 2026-01-01
Supplement: d5lf00290g1.pdf [file d5lf00290g1.pdf]

## Supplementary Information

# Fine-Tuning the Surface Coverage of Niobium Oxide on Platinum Catalysts and Its Impact on the Oxygen Reduction Reaction

*Annabelle M. K. Hadley, Jennie I. Eastcott, Abhinav Parakh, Michael T. Y. Paul, Matthew W.*

*Bilton, Austin W.H. Lee, and Byron D. Gates \**

Department of Chemistry, Simon Fraser University, 8888 University Drive, Burnaby, BC V5A  
1S6 (Canada)

\* Email Address: [bgates@sfu.ca](mailto:bgates@sfu.ca)

This research was supported in part by the Natural Sciences and Engineering Research Council of Canada (NSERC; Grant No. RGPIN-2020-06522), NSERC CGS-D (Annabelle M. K. Hadley), Mitacs Elevate Grant (J. Eastcott), Mitacs Globalink Program (A. Parakh), and CMC Microsystems (MNT Grant No. 4295). M. Bilton thanks Prof. Sarah Haigh and Dr. Matt Smith at the University of Manchester for STEM experimental support using the ThermoFisher Titan 200kV ChemiSTEM with in column Super-X energy dispersive X-ray spectroscopy (EDS). This work also made use of the 4D LABS at Simon Fraser University (SFU) and the Center for Soft Materials shared facilities supported by the Canada Foundation for Innovation (CFI), British Columbia Knowledge Development Fund (BCKDF), Western Economic Diversification Canada, and SFU.

**Table S1.** Comparison of observed Nb 3d, O 1s, and Pt 4f binding energies measured by X-ray photoelectron spectroscopy for samples prepared in this work to values reported in the literature.

| sample                                   | binding energy (eV)     |                         |                   |               |                            |                         | ref. |                         |
|------------------------------------------|-------------------------|-------------------------|-------------------|---------------|----------------------------|-------------------------|------|-------------------------|
|                                          | Nb<br>3d <sub>5/2</sub> | Nb<br>3d <sub>3/2</sub> | O 1s<br>(lattice) | O 1s<br>(−OH) | O 1s<br>(H <sub>2</sub> O) | Pt<br>4f <sub>7/2</sub> |      | Pt<br>4f <sub>5/2</sub> |
| Nb metal                                 | 202.2                   | 204.9                   | -                 | -             | -                          | -                       | -    | (1)                     |
| NbO                                      | 204.4                   | 207.1                   | 531.0             | -             | -                          | -                       | -    | (1)                     |
| NbO <sub>2</sub>                         | 206.1                   | 208.8                   | 529.7             | -             | -                          | -                       | -    | (2)                     |
| Nb <sub>2</sub> O <sub>5</sub>           | 207.7                   | 210.4                   | 531.7             | -             | -                          | -                       | -    | (3)                     |
| Pt metal                                 | -                       | -                       | -                 | -             | -                          | 71.2                    | 74.5 | (4)                     |
| PtO <sub>2</sub>                         | -                       | -                       | 530.3             | -             | -                          | 74.1                    | 77.4 | (4)                     |
| Pt EOT                                   | -                       | -                       | -                 | 532.1         | 533.3                      | 71.2                    | 74.6 | this work               |
| Pt-Nb <sub>2</sub> O <sub>5</sub><br>BOT | 207.6                   | 210.4                   | 531.1             | 532.9         | 534.8                      | -                       | -    | this work               |
| Pt-Nb <sub>2</sub> O <sub>5</sub><br>EOT | 207.6                   | 210.2                   | 530.8             | 532.6         | 534.0                      | 71.5                    | 74.9 | this work               |

**Table S2.** Average advancing and receding water contact angles for each type of custom-prepared Pt-based electrocatalyst.

| sample type                                   | exposed Pt surface area (%) | $\theta_A$ (°) | $\theta_R$ (°) |
|-----------------------------------------------|-----------------------------|----------------|----------------|
| Pt                                            | 100                         | $63 \pm 2$     | $19 \pm 2$     |
| Nb <sub>2</sub> O <sub>5</sub> islands on Pt  | ~65                         | $72 \pm 4$     | $48 \pm 2$     |
| holes in Nb <sub>2</sub> O <sub>5</sub> on Pt | ~30                         | $70 \pm 4$     | $38 \pm 3$     |

\* Abbreviations:  $\theta_A$ : Advancing water contact angle,  $\theta_R$ : Receding water contact angle.

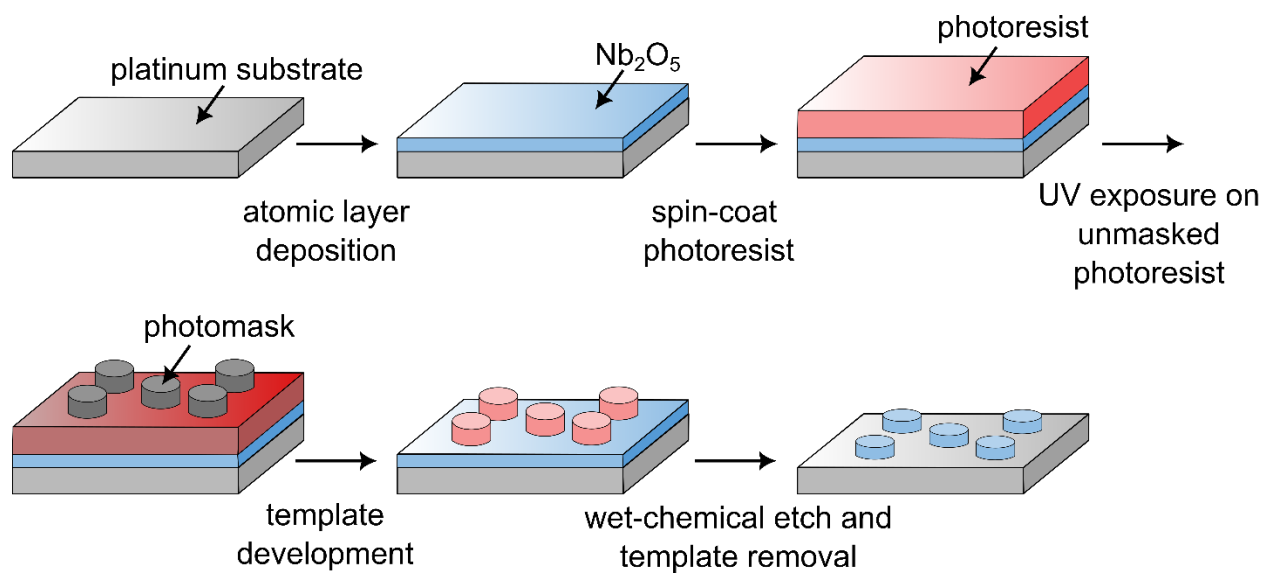

**Figure S1.** Schematic of the preparation of patterned niobium oxide ( $\text{Nb}_2\text{O}_5$ ) films on platinum substrates. This example demonstrates the steps and patterns used to prepare arrays of circular niobium oxide islands supported on a platinum substrate.

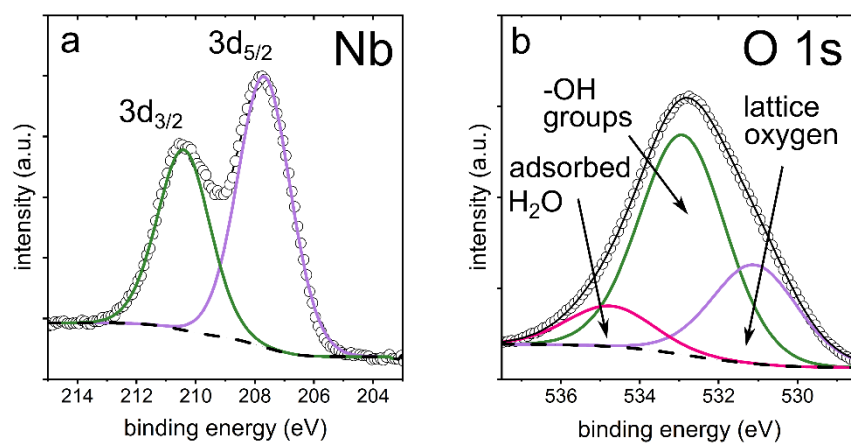

**Figure S2.** High resolution X-ray photoelectron spectroscopy (XPS) analyses of the (a) Nb 3d and (b) O 1s species present in the platinum catalyst coated with an ~1-nm thick  $Nb_2O_5$  layer before electrochemical testing (BOT).

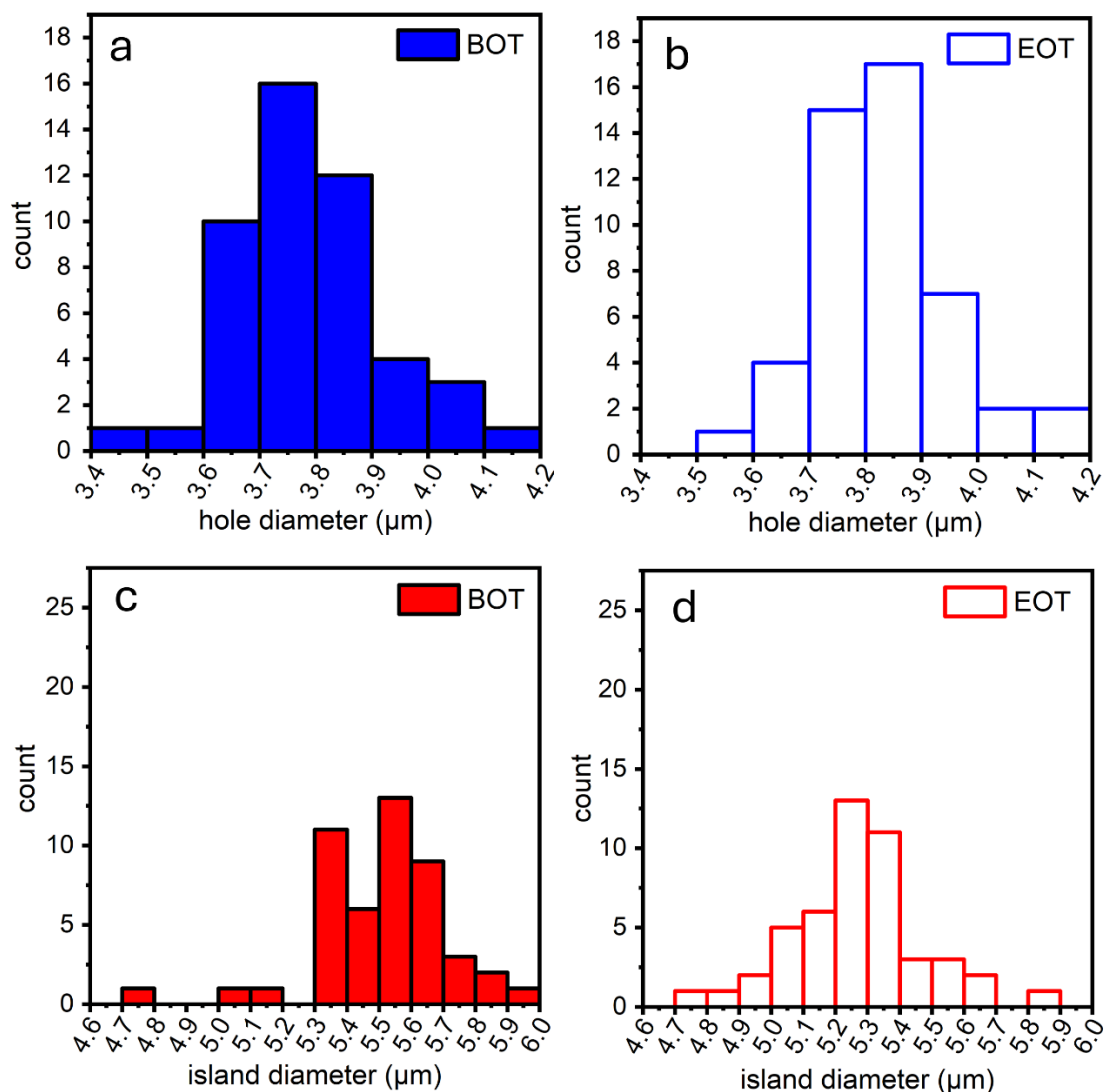

**Figure S3.** Diameter of the (a,b) circular holes and (c,d) circular islands of niobium oxide as measured from a series of scanning electron microscopy (SEM) images obtained (a,c) before and (b,d) after performing a durability test [i.e., 5,000 cycles of the applied potential from 0 to 1.3 V (vs. RHE) while immersing the electrodes in a sulfuric acid electrolyte].

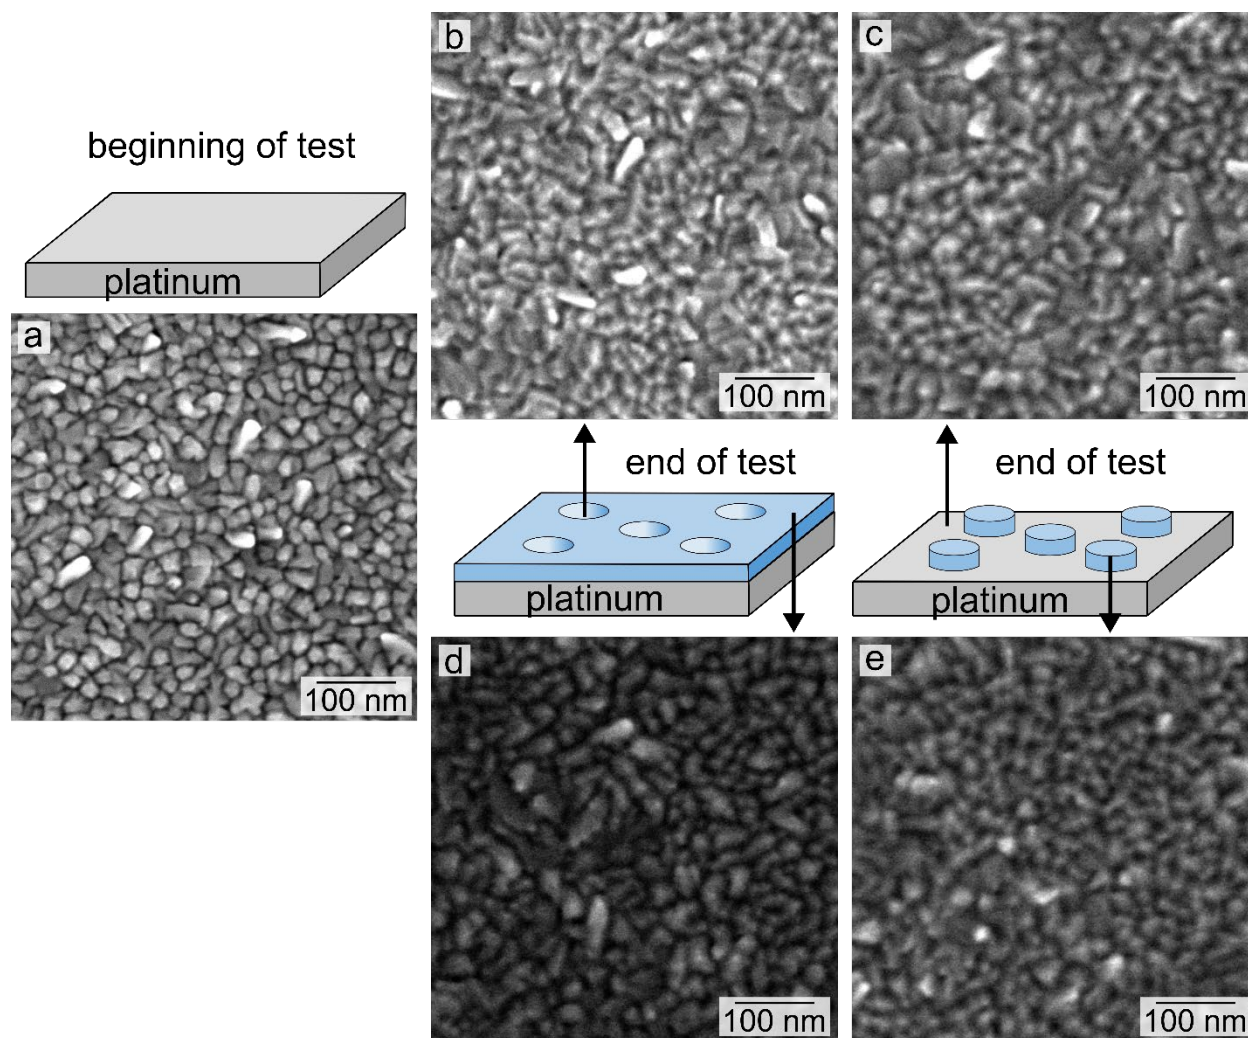

**Figure S4.** Representative SEM images of pristine, uncoated Pt electrocatalysts and two types of Pt electrocatalysts coated with ultrathin, patterned films of Nb<sub>2</sub>O<sub>5</sub> with complementary features [e.g., (b,d) hexagonal arrays of circular holes in the niobium oxide film, or (c,e) hexagonal arrays of circular islands of niobium oxide]. The SEM images were obtained (a) before and (b–e) after a durability test (i.e., 5,000 cycles of the applied potential from 0 to 1.3 V (vs RHE) while immersing the electrodes in a sulfuric acid electrolyte).

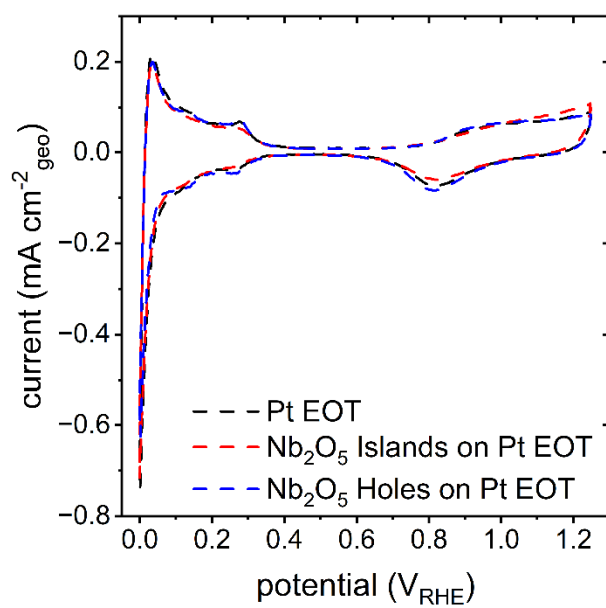

**Figure S5.** A series of cyclic voltammetry plots corresponding to the Pt catalysts (both without and with patterned coatings of Nb<sub>2</sub>O<sub>5</sub> as indicated in the legend) after 5,000 cycles of a durability test (EOT).



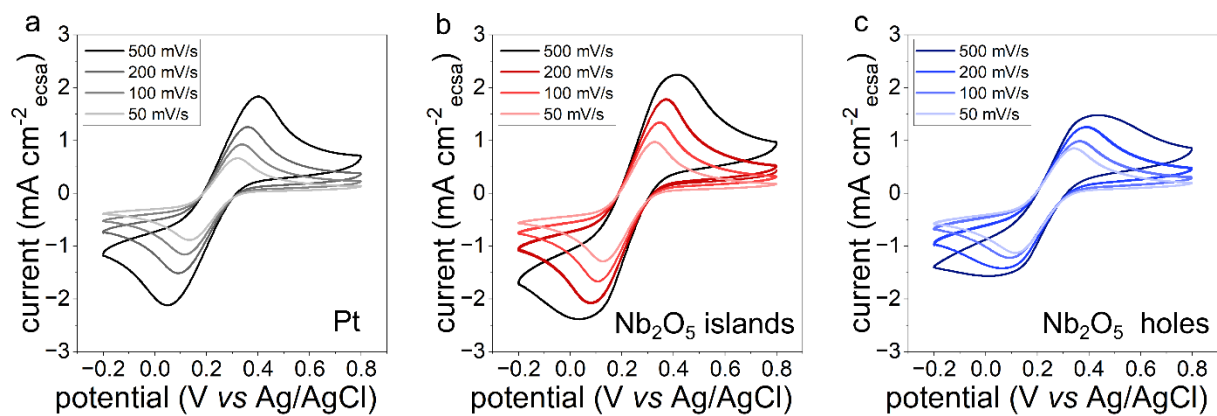

**Figure S6.** Cyclic voltammetry of potassium ferricyanide corresponding to (a) pristine Pt catalysts and arrays of (b) circular islands or (c) circular holes in a Nb<sub>2</sub>O<sub>5</sub> film on Pt.

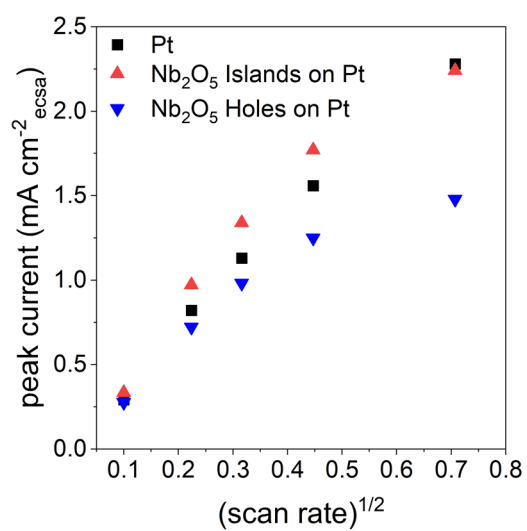

**Figure S7.** Relationship between the peak current of the potassium ferricyanide cyclic voltammetry plot and the square root of the scan rate for the pristine Pt and Pt coated with patterned niobium oxide.

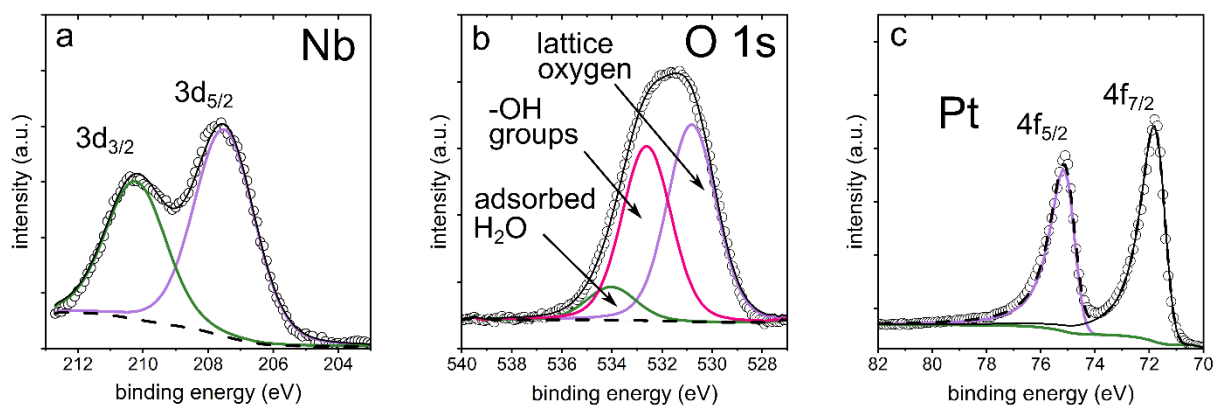

**Figure S8.** High resolution XPS analyses of the (a) Nb 3d, (b) O 1s, and (c) Pt 4f species present in the platinum catalyst coated with an  $\sim 1$ -nm thick  $Nb_2O_5$  layer after being subjected to durability testing (EOT).

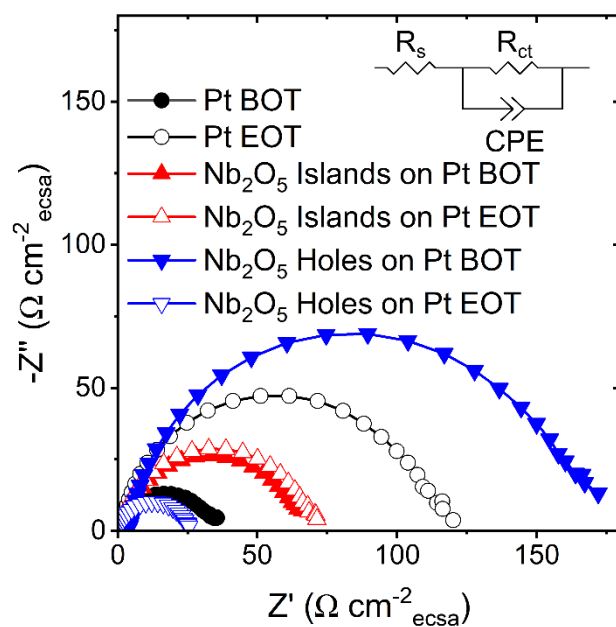

**Figure S9.** Nyquist plots normalized to the  $A_{\text{ecsa}}$  recorded at 0.9  $V_{\text{RHE}}$  in  $\text{O}_2$  saturated electrolyte at BOT (solid symbols) and EOT (hollow symbols) with fits (solid lines) corresponding to the inset circuit.

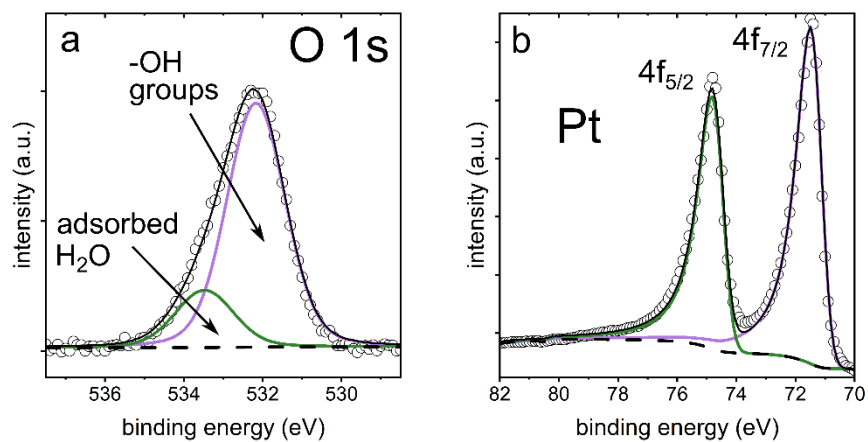

**Figure S10.** High resolution XPS analyses of the (a) O 1s and (b) Pt 4f species present in the pristine platinum catalyst after being subjected to durability testing (EOT).

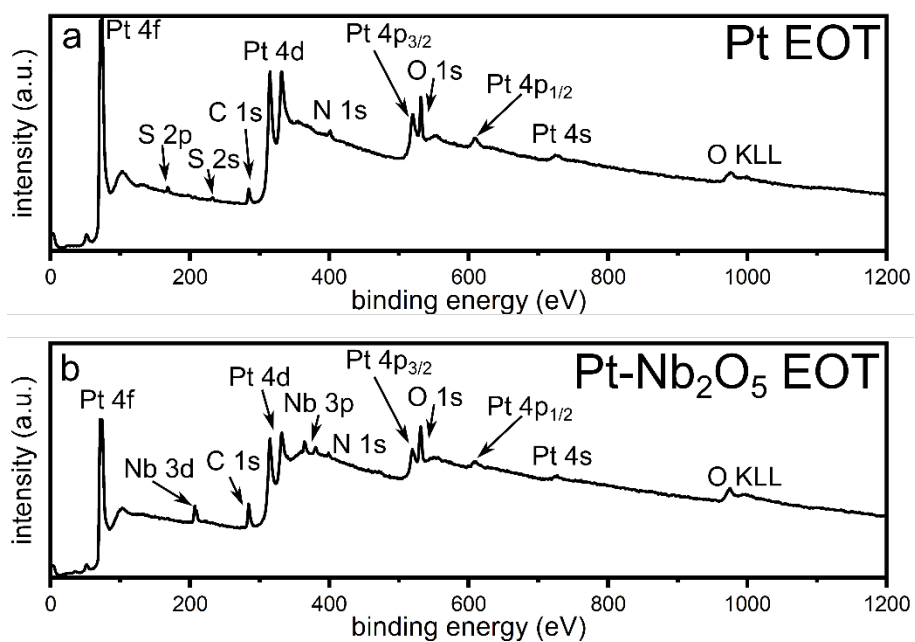

**Figure S11.** X-ray photoelectron spectroscopy survey spectra of the (a) pristine Pt catalyst and (b) Pt catalyst coated with ~1-nm thick Nb<sub>2</sub>O<sub>5</sub> after being subjected to durability testing (EOT).

## References

- (1) Kuznetsov, M. V.; Razinkin, A. S.; Shalaeva, E. V. Photoelectron Spectroscopy and Diffraction of Surface Nanoscale NbO/Nb(110) Structures. *J. Struct. Chem.* **2009**, *50* (3), 514–521. <https://doi.org/10.1007/s10947-009-0079-y>.
- (2) Islam, K.; Sultana, R.; Satpati, B.; Chakraborty, S. Studies on Structural and Dielectric Properties of NbO<sub>2</sub>-Nb<sub>2</sub>O<sub>5</sub> Thin-Film-Based Devices. *Vacuum* **2022**, *195*, 110675. <https://doi.org/10.1016/j.vacuum.2021.110675>.
- (3) Gomes, M. A. B.; Bulhões, L. O. de S.; Castro, S. C. de; Damião, A. J. The Electrochromic Process at Nb<sub>2</sub>O<sub>5</sub> Electrodes Prepared by Thermal Oxidation of Niobium. *J. Electrochem. Soc.* **1990**, *137* (10), 3067. <https://doi.org/10.1149/1.2086161>.
- (4) Peuckert, M.; Bonzel, H. P. Characterization of Oxidized Platinum Surfaces by X-Ray Photoelectron Spectroscopy. *Surf. Sci.* **1984**, *145* (1), 239–259. [https://doi.org/10.1016/00396028\(84\)90778-7](https://doi.org/10.1016/00396028(84)90778-7).
